# Supplementary material
Source: publisher figshare collection journal article supplement (https://gsajournals.figshare.com/articles/dataset/_/6965684)
Supplement: Supplementary file 1 [file 1]

## Sheet: DCV count by strain worm synaps
Strain	Worm	Synapse	# DCVs	Strain	Worm	No. Synapses
N2	JR230-2	1	101	N2	JR230-2	8
		2	8		JR230-3	5
		3	28		JR230-5	4
		4	69	strn-1	JR234-1	2
		5	14		JR234-2	2
		6	34		JR234-3	8
		7	57	sad-1;strn-1	JR236-1	8
		8	16		JR236-2	4
	JR230-3	1	20		JR236-3	4
		2	12	sad-1	JR239-2	5
		3	16		JR239-3	6
		4	9		JR239-4	6
		5	21
	JR230-5	1	12
		2	4
		3	2
		4	67
strn-1	JR234-1	1	13
		2	6
	JR234-2	1	3
		2	2
	JR234-3	1	61
		2	0
		3	2
		4	1
		5	25
		6	0
		7	8
		8	6
sad-1;strn-1	JR236-1	1	10
		2	10
		3	1
		4	2
		5	1
		6	1
		7	9
		8	3
	JR236-2	1	4
		2	7
		3	2
		4	0
	JR236-3	1	5
		2	6
		3	20
		4	20
sad-1	JR239-2	1	5
		2	12
		3	3
		4	46
		5	3
	JR239-3	1	8
		2	21
		3	1
		4	8
		5	8
		6	5
	JR239-4	1	18
		2	16
		3	7
		4	1
		5	69
		6	3
